# Supplementary material for: Cationic poly(lactic-co-glycolic acid) iron oxide microspheres for nucleic acid detection
Source: Royal Society of Chemistry journal article supplement (doi:10.1039/c3nr34355c), 2013-01-01
Supplement: c3nr34355c.pdf [file c3nr34355c.pdf]

## SUPPLEMENTARY INFORMATION

### Cationic Poly(lactic-co-glycolic acid) Iron Oxide Microspheres for Nucleic Acid Detection

Chandra Mouli Pandey<sup>a,b</sup>, Aditya Sharma<sup>a</sup>, Gajjala Sumana<sup>a\*</sup>, Ida Tiwari<sup>b</sup>, Bansi Dhar  
Malhotra<sup>c\*</sup>

<sup>a</sup>Department of Science and Technology Centre on Biomolecular Electronics, Biomedical  
Instrumentation Section, National Physical Laboratory (Council of Scientific & Industrial  
Research), New Delhi-110012, India

<sup>b</sup>Department of Chemistry, Faculty of Sciences, Banaras Hindu University, Varanasi-  
221005, India

<sup>c</sup>Department of Biotechnology, Delhi Technological University, Delhi 110042, India

**Figure S1**

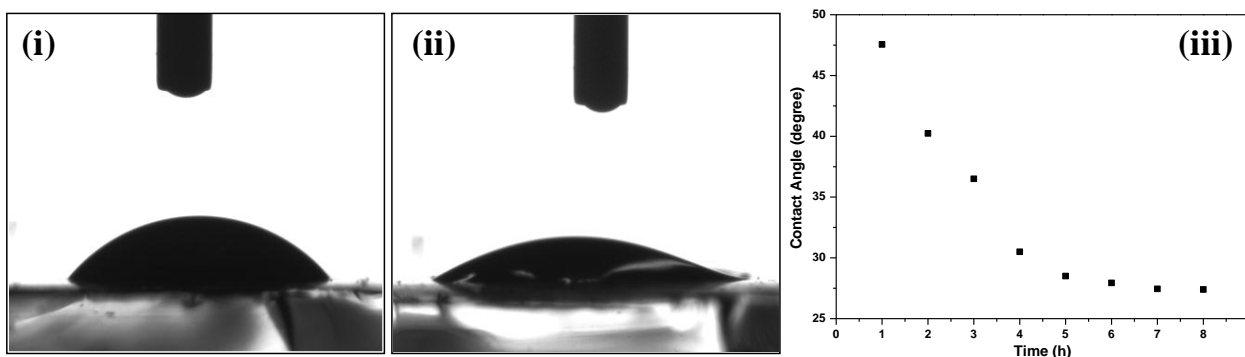

**Figure S1:** Contact angle measurements of (i) PlgNPs/ITO electrode (ii) pDNA/PlgNPs/ITO bioelectrode (iii) CA of pDNA/PlgNPs/ITO bioelectrode as a function of time.

**Figure S2**

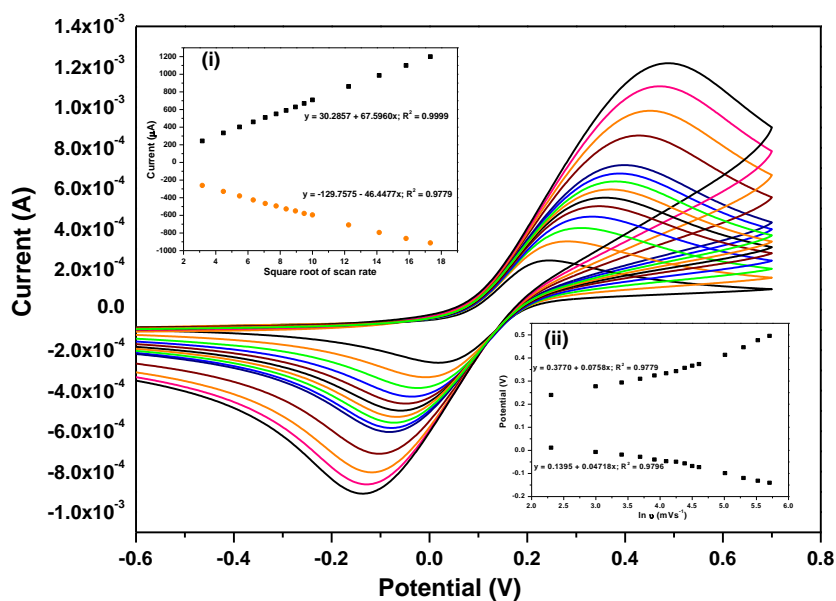

**Figure S2:** Cyclic voltammogram of pDNA/PIgNPs/ITO bioelectrode at scan rate from 10 - 300 mV/S and inset showing the variation of (i) current with respect to square root of scan rate, and (ii) potential with log of scan rate.

**Figure S3**

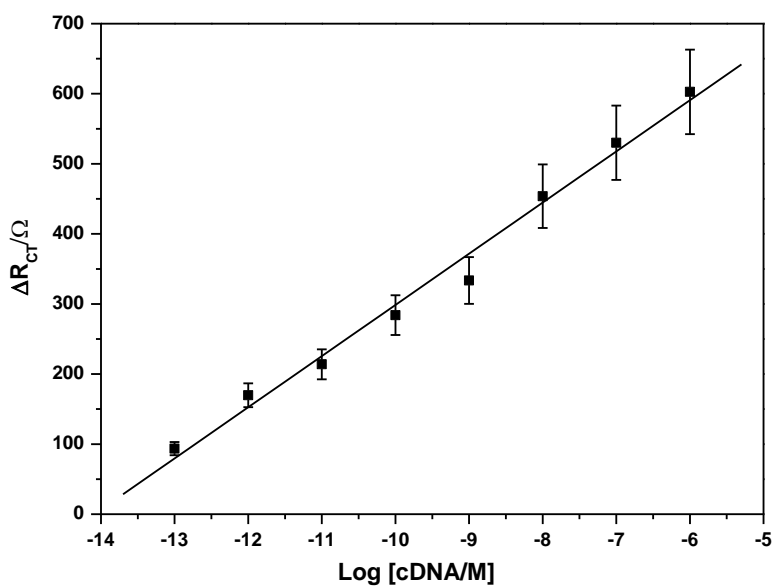

**Figure S3:** Change in  $\Delta R_{CT}$  ( $R_{CT}$  cDNA -  $R_{CT}$  pDNA) as a function of logarithm of target DNA concentration.

**Figure S4**

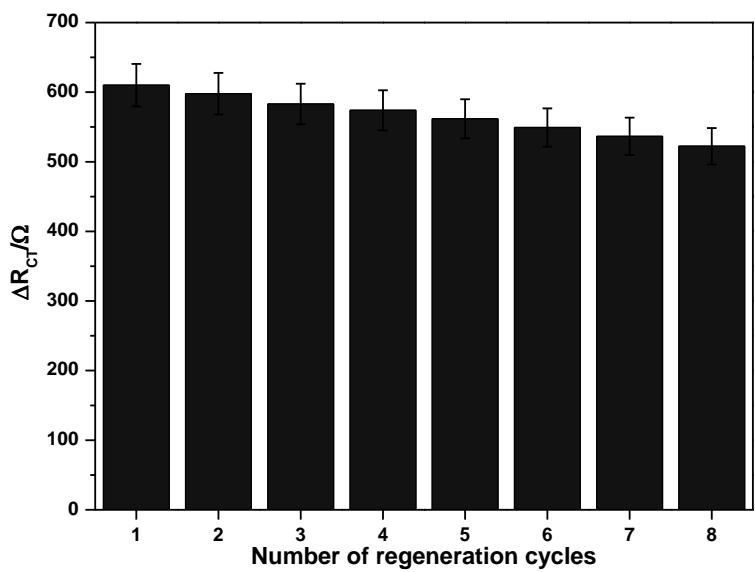

**Figure S4:** Comparison of the  $\Delta R_{CT}$  values of pDNA/PlgNPs/ITO bioelectrode with repeated denaturation and rehybridization process.

**Table S1**

| Chitosan concentration (weight %) | Size (d, nm) | Zeta potential |
|-----------------------------------|--------------|----------------|
| 0.1                               | 298.5        | 19.8           |
| 0.2                               | 306.3        | 27.3           |
| 0.3                               | 311.5        | 34.9           |

**Table S1:** Mean size and zeta potential of PlgNPs with varying chitosan concentration.

**Table S2**

| Sl.No | Working electrode                                | Detection Range                                 | Limit of Detection       | Reusability | Reference    |
|-------|--------------------------------------------------|-------------------------------------------------|--------------------------|-------------|--------------|
| 1     | PTCA/graphene/GCE                                | $1.0 \times 10^{-12}$ to $1.0 \times 10^{-6}$ M | $5.0 \times 10^{-13}$ M  | -           | 34           |
| 2     | Al(III)/PLGA/CPE                                 | $1.0 \times 10^{-11}$ to $1.0 \times 10^{-6}$ M | $3.03 \times 10^{-12}$ M | 3 times     | 36           |
| 3     | graphene/AuNPs/SPCE                              | $5.0 \times 10^{-14}$ to $5.0 \times 10^{-9}$ M | $1.0 \times 10^{-14}$ M  | -           | 37           |
| 4     | Au <sub>nano</sub> -CNT/PAN <sub>nano</sub> /CPE | $1.0 \times 10^{-12}$ to $1.0 \times 10^{-6}$ M | $5.6 \times 10^{-13}$ M  | 6 times     | 38           |
| 5     | denCys/Au                                        | $1.0 \times 10^{-14}$ to $1.0 \times 10^{-6}$ M | $1.0 \times 10^{-14}$ M  | 4 times     | 23           |
| 6     | pDNA/PlgNPs/ITO                                  | $1.0 \times 10^{-13}$ to $1.0 \times 10^{-6}$ M | $8.7 \times 10^{-14}$ M  | 8 times     | present work |

**Table S2:** Comparison of response characteristics of pDNA/PlgNPs/ITO bioelectrode along with those of other nanoparticles based impedimetric DNA sensors reported in literature.
